# Supplementary material
Source: Springer Nature journal article supplement (https://www.springermedizin.de/resource/supplementary/13048_2013_157_MOESM14_ESM.pdf/9664996)
Supplement: MOESM14 [file 9664996]

| Gene                                                                            | Small putative ovarian stem cells (OSCs) |        |        | Human embryonic stem cells (hESCs) |        |        | Fibroblasts (FBs) |        |        |
|---------------------------------------------------------------------------------|------------------------------------------|--------|--------|------------------------------------|--------|--------|-------------------|--------|--------|
|                                                                                 | OSC_4                                    | OSC_5  | OSC_6  | ESC_10                             | ESC_11 | ESC_12 | FB_13             | FB_14  | FB_15  |
| POU5F1                                                                          | 0.039                                    | 0.304  | 0.000  | 5.341                              | 5.585  | 5.239  | -0.777            | -0.018 | -1.042 |
| SALL4                                                                           | 1.945                                    | 2.095  | 0.732  | 5.797                              | 5.754  | 5.367  | -3.610            | -4.315 | -2.259 |
| CDH1                                                                            | 3.570                                    | 0.752  | -1.214 | 8.530                              | 8.723  | 9.034  | -1.326            | -1.145 | -0.677 |
| LIN28B                                                                          | 2.031                                    | 5.319  | 0.000  | 8.324                              | 7.054  | 7.607  | -1.404            | -1.367 | -1.534 |
| NANOG                                                                           | 3.616                                    | -0.653 | -1.716 | 7.842                              | 7.244  | 7.411  | 1.129             | 0.000  | 0.724  |
| SOX2                                                                            | -1.679                                   | -1.792 | 0.629  | 6.683                              | 7.592  | 8.974  | -0.001            | 1.546  | -0.293 |
| SOX11                                                                           | 2.554                                    | 3.061  | 0.097  | 7.131                              | 6.043  | 7.429  | -0.089            | -0.122 | -0.067 |
| DPPA3                                                                           | -2.129                                   | -2.106 | -2.106 | 4.669                              | 4.591  | 4.923  | -0.993            | 1.533  | -0.318 |
| LEFTY1                                                                          | 1.360                                    | 2.637  | -1.835 | 7.673                              | 5.816  | 5.894  | -2.232            | -2.243 | -2.214 |
| ZIC3                                                                            | 3.357                                    | 3.890  | -0.031 | 10.955                             | 10.695 | 10.539 | -0.176            | -0.189 | -0.141 |
| ZIC5                                                                            | -1.385                                   | -1.407 | 1.277  | 4.511                              | 7.112  | 6.787  | -0.508            | -0.801 | -0.997 |
| PRDM14                                                                          | 1.299                                    | 3.176  | -0.676 | 7.127                              | 6.865  | 7.879  | -1.108            | -1.639 | -1.417 |
| GAL                                                                             | -1.452                                   | 2.294  | 0.000  | 4.792                              | 6.413  | 5.019  | -0.453            | -1.952 | -1.070 |
| PPP1R9A                                                                         | -1.546                                   | 0.000  | -2.166 | 2.191                              | 4.463  | 3.086  | -0.038            | -0.283 | -1.170 |
| SMO                                                                             | -1.247                                   | -4.586 | -2.274 | 3.684                              | 2.515  | 3.271  | -2.509            | -2.262 | -1.926 |
| MMP25                                                                           | -2.762                                   | -4.218 | -0.617 | 5.036                              | 5.463  | 3.496  | -0.947            | -1.310 | -0.936 |
| MLLT4                                                                           | -3.357                                   | -5.642 | -2.421 | 1.525                              | 2.919  | 1.841  | -0.050            | -0.228 | 0.000  |
| BMP7                                                                            | -3.470                                   | -2.680 | 0.593  | 4.007                              | 4.917  | 5.233  | -0.511            | -1.055 | 0.000  |
| MYBL2                                                                           | 1.400                                    | 0.000  | 0.348  | 5.461                              | 5.074  | 4.665  | -1.482            | -1.570 | -1.910 |
| DNMT3B                                                                          | 1.837                                    | 0.294  | -1.750 | 6.926                              | 7.145  | 6.530  | -0.812            | -0.888 | -1.107 |
| ZFP42                                                                           | 0.044                                    | 1.874  | -0.057 | 9.102                              | 9.953  | 9.575  | -0.093            | -0.090 | -0.088 |
| HESRG                                                                           | 6.518                                    | 4.582  | 0.000  | 9.800                              | 10.341 | 9.167  | -1.437            | -1.498 | -1.096 |
| ZSCAN10                                                                         | 0.000                                    | 2.187  | 1.140  | 5.529                              | 6.392  | 5.087  | -0.001            | -0.754 | -0.083 |
| TRO                                                                             | -4.214                                   | 0.000  | -4.187 | 2.672                              | 1.401  | 2.642  | -1.643            | -0.008 | -1.287 |
| DDX11                                                                           | -3.783                                   | -1.788 | 0.000  | 4.870                              | 4.240  | 3.977  | -0.227            | -0.468 | -0.416 |
| Legend: dark yellow intensities ≥ 2.000, bright yellow intensities 0.100-1.999. |                                          |        |        |                                    |        |        |                   |        |        |
